# Supplementary material for: BRCA1 overexpression attenuates breast cancer cell growth and migration by regulating the pyruvate kinase M2-mediated Warburg effect via the PI3K/AKT signaling pathway
Source: PeerJ. 2022 Sep 28;10:e14052. doi: 10.7717/peerj.14052 (PMC9526413; doi:10.7717/peerj.14052)
Supplement: Supplemental Information 2 [file peerj-10-14052-s002.xlsx]

## Sheet: Sheet1
Figure1
LXSN	BRCA1
PKM2
0.95	0.40628
1	0.33082
1.05	0.62846
BRCA1
0.95	4.34829
1	5.34029
1.05	4.23811
apoptotic number
2	4
3	4
3	5
2	4
2	6
2	4
1	5
Figure2
LXSN	BRCA1
HK2
0.95	0.386322
1	0.472083
1.05	0.628329
IDH1
0.95	4.46821
1	3.41233
1.05	3.13424
Lactate
3.8128	2.393
4.0782	2.0462
4.1502	2.1293
Glucose
1.8223	0.8382
1.5139	0.5229
2.0507	0.6142
	LXSN			BRCA1
0H	139	147	133	135	148	143
4H	119	129	112	86	73	76
20H	109	124	129	77	66	75
Figure3
Number of migrated cells
LXSN	BRCA1
158	69
147	55
87	84
109	77
147	128
178	55
156	77
Figure4
LXSN	BRCA1
Cisplatin
17.1829	11.1338
23.1319	15.1891
24.8293	12.1284
Paclitaxel
35.2867	12.2829
25.2827	15.3201
26.1889	18.1339
Doxorubicin
16.1276	3.18629
11.9327	8.22891
13.0827	6.13929
Figure5
LXSN	BRCA1
p-akt/akt
0.95	0.693182
1	0.472299
1.05	0.627381
	Control			LY294002
Lactate	3.5892	4.1113	4.3618	2.3882	2.0527	2.1162
Glucose	1.9382	1.3847	2.5489	0.8482	0.6168	0.6135
apoptotic number
	Control							LY294002
LXSN	2	3	1	2	1	2	3	4	6	5	6	5	4	5
BRCA	4	5	5	6	6	4	5	4	5	7	6	5	4	7
Figure6
Si-C	Si-PKM2
p-akt/akt
0.95	0.587291
1	0.327176
1.05	0.428261
apopotic number
2	4
1	5
3	3
3	7
2	6
3	4
2	5
Figure7
Control	Si-PKM2
Cisplatin
18.7028	12.2122
22.9224	16.1112
23.1842	10.1892
Doxorubicin
13.9282	3.41038
12.1298	5.38912
10.0628	6.63416
Paclitaxel
33.8292	13.2653
22.392	16.3986
27.193	17.6543
Figure8
Si-C	Si-PKM2
157	67
94	50
187	78
108	89
105	69
108	58
156	98
